# Supplementary material
Source: publisher site journal article supplement (https://www.dovepress.com/article/560362)
Supplement: Supplementary file 1 [file Supplementary%20material%201.pdf]

**Supplementary Material 1. Questionnaire on apolipoprotein B (apoB) Testing Knowledge and Practice in Cardiovascular Risk Assessment**

| <b>Section I: Demographic and Professional Characteristics</b>                                |                                                                                                                                                                                                                                                                                            |
|-----------------------------------------------------------------------------------------------|--------------------------------------------------------------------------------------------------------------------------------------------------------------------------------------------------------------------------------------------------------------------------------------------|
| 1. What is your age (years)?                                                                  | <ul style="list-style-type: none"> <li>a) &lt; 35 years</li> <li>b) 35-40 years</li> <li>c) 41-45 years</li> <li>d) 46-50 years</li> <li>e) &gt;50 years</li> </ul>                                                                                                                        |
| 2. What is your Sex:                                                                          | <ul style="list-style-type: none"> <li>a) Male</li> <li>b) Female</li> </ul>                                                                                                                                                                                                               |
| 3. What is your profession?                                                                   | <ul style="list-style-type: none"> <li>a) Physician</li> <li>b) Pharmacist</li> </ul>                                                                                                                                                                                                      |
| 4. What is your specialty:                                                                    | <ul style="list-style-type: none"> <li>a) Cardiology</li> <li>b) Family medicine</li> <li>c) Endocrinology</li> <li>d) Ambulatory care</li> <li>e) Internal medicine</li> <li>f) Community medicine</li> <li>g) Nephrology</li> <li>h) General practice (GP)</li> <li>i) Others</li> </ul> |
| 5. What is your current primary workplace?                                                    | <ul style="list-style-type: none"> <li>a) Governmental hospital/Clinics</li> <li>b) Private hospital/Clinics</li> <li>c) Academic Institution</li> </ul>                                                                                                                                   |
| 6. How many years of experience as a practicing physician or clinical pharmacist do you have? | <ul style="list-style-type: none"> <li>a) 1-5 years</li> <li>b) 6-10 years</li> <li>c) 11-15 years</li> <li>d) &gt;15 years</li> </ul>                                                                                                                                                     |
| 7. On average, approximately, how many patients do you see per week?                          | <ul style="list-style-type: none"> <li>a) less than 25 patients</li> <li>b) 25-50 patients</li> <li>c) 51-75 patients</li> <li>d) 76-100 patients</li> <li>e) &gt; 100 patients</li> </ul>                                                                                                 |

| <b>Section II: Knowledge regarding the role of apoB in the clinical management of cardiovascular risk in adults before and during treatment with lipid lowering therapy</b> |                                                                                                                                                                                                                                                                               |
|-----------------------------------------------------------------------------------------------------------------------------------------------------------------------------|-------------------------------------------------------------------------------------------------------------------------------------------------------------------------------------------------------------------------------------------------------------------------------|
| 1. ApoB measurement provides additional essential information to that found in a standard lipoprotein lipid panel.                                                          | <ul style="list-style-type: none"> <li>a) Yes</li> <li>b) No</li> <li>c) Not sure</li> </ul>                                                                                                                                                                                  |
| 2. LDL-C is superior to apoB in ASCVD risk assessment.                                                                                                                      | <ul style="list-style-type: none"> <li>d) Yes</li> <li>e) No</li> <li>f) Not sure</li> </ul>                                                                                                                                                                                  |
| 3. ApoB measurement is a direct measure that represents the total concentration of the atherogenic lipoprotein particles in the circulation                                 | <ul style="list-style-type: none"> <li>a) Yes</li> <li>b) No</li> <li>c) Not sure</li> </ul>                                                                                                                                                                                  |
| 4. Unlike other lipid tests, there is no suggested prevention or treatment thresholds for apoB                                                                              | <ul style="list-style-type: none"> <li>a) Yes</li> <li>b) No</li> <li>c) Not sure</li> </ul>                                                                                                                                                                                  |
| 5. There are published clinical guidelines in Saudi Arabia that provide guidance on the apoB analysis                                                                       | <ul style="list-style-type: none"> <li>a) Yes</li> <li>b) No</li> <li>c) Not sure</li> </ul>                                                                                                                                                                                  |
| 6. ApoB measurement is only beneficial to assess the impact of genetic risk factors of dyslipidemia                                                                         | <ul style="list-style-type: none"> <li>a) Yes</li> <li>b) No</li> <li>c) Not sure</li> </ul>                                                                                                                                                                                  |
| 7. ApoB testing requires specialized laboratories to be performed which hinders its availability in routine practice                                                        | <ul style="list-style-type: none"> <li>a) Yes</li> <li>b) No</li> <li>c) Not sure</li> </ul>                                                                                                                                                                                  |
| 8. ApoB is only measured in patients who have already experienced a cardiovascular event                                                                                    | <ul style="list-style-type: none"> <li>a) Yes</li> <li>b) No</li> <li>c) Not sure</li> </ul>                                                                                                                                                                                  |
| 9. In which clinical scenarios is apoB testing most beneficial for assessing ASCVD risk?                                                                                    | <ul style="list-style-type: none"> <li>a) Initial risk assessment for all patients with dyslipidemia</li> <li>b) When there is discordance between LDL-C and non-HDL-C levels</li> <li>c) Following lipid-lowering therapy to assess response</li> <li>d) Not sure</li> </ul> |
| 10. Which measurement is most reliable for assessing ASCVD residual risk in patients with lipid profile discordance?                                                        | <ul style="list-style-type: none"> <li>a) LDL-C</li> <li>b) Non-HDL-C</li> <li>c) ApoB</li> <li>d) Not sure</li> </ul>                                                                                                                                                        |

### Section III: Practice and utilization

|                                                                                                                          |                                                                                                                                                                                                                                   |
|--------------------------------------------------------------------------------------------------------------------------|-----------------------------------------------------------------------------------------------------------------------------------------------------------------------------------------------------------------------------------|
| 1. How often do you use a risk calculator to estimate the 10-year risk of ASCVD in your practice for primary prevention? | a) Never<br>b) Rarely<br>c) Occasionally<br>d) Frequently                                                                                                                                                                         |
| 2. Do you routinely assess apoB levels in patients considered at high risk for ASCVD?                                    | a) Yes - for all high-risk patients<br>b) Yes - but only for selected high-risk cases<br>c) No - but would consider testing when available<br>d) No - do not perceive a clinical need<br>e) No - unfamiliar with its clinical use |

### Section IV: Educational interest

|                                                                                                                                                |                                                                                                  |
|------------------------------------------------------------------------------------------------------------------------------------------------|--------------------------------------------------------------------------------------------------|
| 1. How interested are you in attending continuing education (CE) activity focused on the importance of ApoB in cardiovascular risk assessment? | a) Very interested<br>b) Interested<br>c) Neutral<br>d) Not interested<br>e) Not very interested |
|------------------------------------------------------------------------------------------------------------------------------------------------|--------------------------------------------------------------------------------------------------|

Low-Density Lipoprotein Cholesterol (LDL-C), Very-low-density lipoprotein Cholesterol (VLDL-C), Non-High-Density Lipoprotein Cholesterol (non-HDL-C), Apolipoprotein B (ApoB)
